# Supplementary material for: Designed to Fail? Revisiting Uganda’s Maternal Health Policies to Understand Policy Design Issues Underpinning Missed Targets for Reduction of Maternal Mortality Ratio (MMR): 2000-2015
Source: PubMed Central journal article supplement (PMC9808297; doi:10.34172/ijhpm.2021.127), 2021-09-07
Supplement: ijhpm-11-2124-s001.pdf [file ijhpm-11-2124-s001.pdf]

**Article title:** Designed to Fail? Revisiting Uganda’s Maternal Health Policies to Understand Policy Design Issues Underpinning Missed Targets for Reduction of Maternal Mortality Ratio (MMR): 2000-2015

**Journal name:** International Journal of Health Policy and Management (IJHPM)

**Authors’ information:** Moses Mukuru<sup>1\*</sup>, Jonathan Gorry<sup>2</sup>, Suzanne N. Kiwanuka<sup>1</sup>, Linda Gibson<sup>2</sup>, David Musoke<sup>3</sup>, Freddie Ssengooba<sup>1</sup>

<sup>1</sup>Department of Health Policy, Planning and Management, School of Public Health, College of Health Sciences, Makerere University, Kampala, Uganda.

<sup>2</sup>School of Social Sciences, Nottingham Trent University, Nottingham, UK.

<sup>3</sup>Department of Disease Control and Environmental Health, School of Public Health, College of Health Sciences, Makerere University, Kampala, Uganda.

(\*Corresponding author: [mmukuru@musph.ac.ug](mailto:mmukuru@musph.ac.ug))

**Supplementary file 1.**

**Table S1: National maternal health policy documents reviewed**

| No | Document description                                                                                                                                     | Type                              | Year/<br>lifespan |
|----|----------------------------------------------------------------------------------------------------------------------------------------------------------|-----------------------------------|-------------------|
| 1. | GoU, (1999), Health sub district policy; Roll out of CEmOC within 5KM radius of the population                                                           | Health sector policy              | 1999- to date     |
| 2. | MoH, (1999), National Health Policy - Essential antenatal and Obstetric care                                                                             | Health sector policy              | 1999-2009         |
| 3. | MoFPED, (2000), Uganda's Poverty Eradication Action Plan; Reduction of maternal death as an essential strategy of poverty reduction                      | Overall national policy framework | 2000 - 2004       |
| 4. | MoH, (2000), Health Sector Strategic Plan 2000/01 – 2004/05; maternal health as an essential element of comprehensive and integrated reproductive health | Health sector strategic plan      | 2000 - 2005       |

| No  | Document description                                                                                                                                                                                                   | Type                              | Year/<br>lifespan |
|-----|------------------------------------------------------------------------------------------------------------------------------------------------------------------------------------------------------------------------|-----------------------------------|-------------------|
| 5.  | MoH, (2001), The National Policy Guidelines and Service Standards for Reproductive Health Services; Quality integrated reproductive health service                                                                     | Programme guidelines              | 2001 - 2004       |
| 6.  | MoH, (2004), National Adolescent Health Policy for Uganda; introduction of post abortion care and adolescent friendly services                                                                                         | Programme Policy                  | 2004              |
| 7.  | MoFPED, (2004), Uganda's Poverty Eradication Action Plan; Increasing access to functional CEmOC                                                                                                                        | Overall national policy framework | 2004 - 2008       |
| 8.  | MoH, (2006), The National Policy Guidelines and Service Standards for Sexual and Reproductive Health and Rights 2006; TBA as skilled providers, Provision of BEmOC at HC II, maternal and perinatal mortality auditing | Programme guidelines              | 2006              |
| 9.  | MoH, (2005), Health Sector Strategic Plan II 2005/06 – 2009/2010; Universal delivery of the Uganda National Minimum Health Care Package, Selective provision of delivery services at HC II, Maternal death reviews     | Health sector strategic plan      | 2006 - 2010       |
| 10. | MoH, (2007), Roadmap for Accelerating the Reduction of Maternal and Neonatal Mortality and Morbidity in Uganda; Holistic approach to delivery of maternal health services (using the three delay model)                | Programme Strategy                | 2007 - 2015       |
| 11. | MoH, (2010), The second national health policy; Universal Access to EmOC and MH services                                                                                                                               | Health sector policy              | 2010 - to date    |
| 12. | NPA, 2010), National Development Plan (2010/11 - 2014/15); Health systems and quality of care for maternal health                                                                                                      | Overall national policy framework | 2010 - 2015       |
| 13. | MoH, (2010), Health Sector Strategic & Investment Plan 2010/11 – 2014/15; Universal Coverage of maternal and other services, Institutionalise delivery at HC II                                                        | Health sector strategic plan      | 2010 - 2015       |

| No  | Document description                                                                                                                    | Type                  | Year/<br>lifespan |
|-----|-----------------------------------------------------------------------------------------------------------------------------------------|-----------------------|-------------------|
| 14. | MoH, (2011), The National Adolescent Health-Strategy; Comprehensive Adolescent friendly SRH                                             | Programme Strategy    | 2011-2015         |
| 15. | Ministerial directive on Maternal death review (Admin.45/273/01 dated 10th May 2011); Confidential inquiry and criminal prosecution     | Ministerial directive | 2011 to date      |
| 16. | MoH, (2013), Reproductive Maternal, New-born and Child Health Sharpened Plan for Uganda; High impact lifesaving interventions for women | Programme Strategy    | 2013 - 2017       |

**Table S2. National maternal health programme performance reports reviewed**

| No | Document description                                                                                                                                 | Type                           | Year/<br>lifespan |
|----|------------------------------------------------------------------------------------------------------------------------------------------------------|--------------------------------|-------------------|
| 1. | Annual Health Sector Performance Report Financial Year 2000/2001                                                                                     | Health sector programme report | 2001              |
| 2. | Uganda Bureau of Statistics (UBOS) and ORC Macro.2001. Uganda Demographic and Health Survey 2000-2001. Calverton, Maryland, USA: UBOS and ORC Macro. | National survey report         | 2001              |
| 3. | Annual Health Sector Performance Report 2003/2004                                                                                                    | Health sector programme report | 2004              |
| 4. | Annual Health Sector Performance Report 2004/2005                                                                                                    | Health sector programme report | 2005              |
| 5. | Uganda Bureau of Statistics (UBOS) and Macro International Inc. 2007. Uganda Demographic and Health                                                  | National survey report         | 2007              |

| No  | Document description                                                                                                                                                                 | Type                                 | Year/<br>lifespan |
|-----|--------------------------------------------------------------------------------------------------------------------------------------------------------------------------------------|--------------------------------------|-------------------|
|     | Survey 2006. Calverton, Maryland, USA: UBOS and Macro International Inc.                                                                                                             |                                      |                   |
| 6.  | Annual Health Sector Performance Report 2006/2007                                                                                                                                    | Health sector<br>programme<br>report | 2007              |
| 7.  | Uganda National Service delivery report 2008                                                                                                                                         | National survey<br>report            | 2008              |
| 8.  | Annual Health Sector Performance Report 2008/2009                                                                                                                                    | Health sector<br>programme<br>report | 2009              |
| 9.  | Annual Health Sector Performance Report 2009/2010                                                                                                                                    | Health sector<br>programme<br>report | 2010              |
| 10. | Annual Health Sector Performance Report 2010/2011                                                                                                                                    | Health sector<br>programme<br>report | 2011              |
| 11. | Maternal & Perinatal Death Reviews - report Uganda: 2009-2011                                                                                                                        | Health sector<br>programme<br>report | 2011              |
| 12. | Annual Health Sector Performance Report 2011/2012                                                                                                                                    | Health sector<br>programme<br>report | 2012              |
| 13. | Uganda Bureau of Statistics (UBOS) and ICF International Inc. 2012. Uganda Demographic and Health Survey 2011. Kampala, Uganda: UBOS and Calverton, Maryland: ICF International Inc. | National survey<br>report            | 2012              |
| 14. | Annual Health Sector Performance Report 2012/2013                                                                                                                                    | Health sector<br>report              | 2013              |

| No  | Document description                                                                                                                                           | Type                                 | Year/<br>lifespan |
|-----|----------------------------------------------------------------------------------------------------------------------------------------------------------------|--------------------------------------|-------------------|
| 15. | Maternal and Perinatal Death Review Uganda 2012/13                                                                                                             | Health sector<br>report              | 2013              |
| 16. | Annual Health Sector Performance Report 2013/2014                                                                                                              | Health sector<br>programme<br>report | 2014              |
| 17. | Health centre IV/Hospital census                                                                                                                               | National Census<br>report            | 2014              |
| 18. | Annual Health Sector Performance Report 2014/2015                                                                                                              | Health sector<br>programme<br>report | 2015              |
| 19. | Maternal and Perinatal Death Review report - Uganda 2013<br>/14                                                                                                | Health sector<br>programme<br>report | 2015              |
| 20. | Uganda National Service delivery report 2015                                                                                                                   | National survey<br>report            | 2015              |
| 21. | Uganda Bureau of Statistics (UBOS) and ICF. 2018.<br>Uganda Demographic and Health Survey 2016. Kampala,<br>Uganda and Rockville, Maryland, USA: UBOS and ICF. | National survey<br>report            | 2018              |
